# Supplementary material for: Retracted Article: Synergetic effects of ultrasound combined with Fenton pretreatment that accelerates wasted activated sludge anaerobic fermentation to produce volatile fatty acids
Source: Royal Society of Chemistry journal article supplement (doi:10.1039/c6ra19028f), 2016-01-01
Supplement: c6ra19028f1.pdf [file c6ra19028f1.pdf]

## Electronic Supporting Materials:

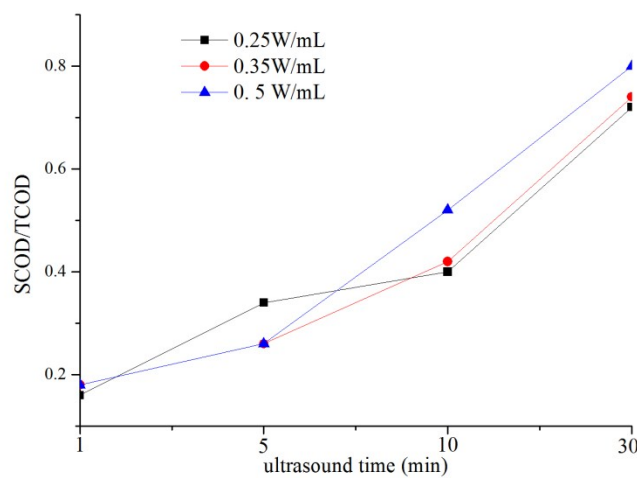

**Fig.S1** The change of SCOD/TCOD with the ultrasonic time

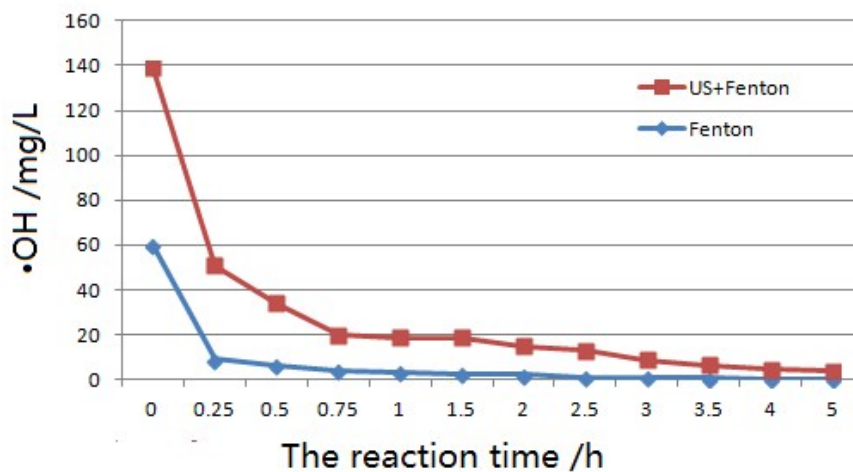

**Fig.S2** The concentration change of  $\cdot\text{OH}$  during the process of Fenton and US + Fenton treatment

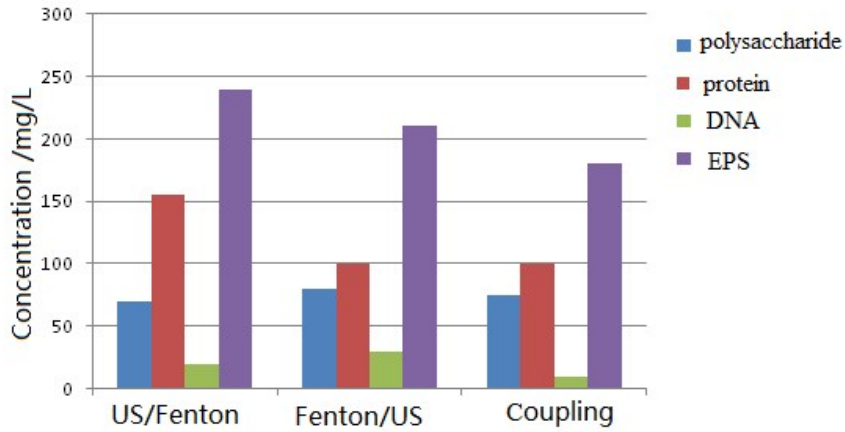

**Fig.S3** The change of EPS concentration in the supernatant when the sludge is treated by different combination treatments

**Table S1** The sludge particle size of the samples

| Sample     | [a] ( $\mu\text{m}$ ) | $d_{50}$ ( $\mu\text{m}$ ) |
|------------|-----------------------|----------------------------|
| Untreated  | 50.24                 | 44.01                      |
| Fenton     | 44.77                 | 41.53                      |
| Ultrasound | 25.18                 | 24.52                      |
| Us/Fenton  | 22.44                 | 22.63                      |

[a] The sludge particle size corresponds the largest volume percentage

**Table S2** the effect of different pretreatments

| treatment | $d_{50}$ ( $\mu\text{m}$ ) | SCOD | Soluble carbohydrate | Soluble protein | $DD_{\text{COD}}$ (%) | VFA <sub>s</sub> |
|-----------|----------------------------|------|----------------------|-----------------|-----------------------|------------------|
| Untreated | 44.01                      | 260  | 25                   | 154             | 0                     | 683              |
| Fenton    | 41.53                      | 1290 | 186                  | 847             | 3.18                  | 3485             |
| Us        | 24.52                      | 2005 | 203                  | 1400            | 9.97                  | 2700             |
| US/Fenton | 22.63                      | 3461 | 441                  | 2059            | 15.4                  | 4594             |

Note: the unit of soluble organic matters is  $\text{mg L}^{-1}$ .
